# Supplementary material for: Assessing the prognostic value of Age-adjusted EASIX for predicting mortality in critically ill surgical patients: a retrospective cohort study
Source: Research Square preprint supplement (doi:10.21203/rs.3.rs-7364770/v1), 2025-09-24
Supplement: Supplementary file 1 [file 4c0a288ede1224015843983d.docx]

**Table S1 Missing Number (%) for Included Variables in Dataset**

| **variables** | **Missing (%)** |
| --- | --- |
| PTT (sec) | 194 (4.42%) |
| PT (sec) | 180 (4.10%) |
| INR | 182 (4.14%) |
| ALT (IU/L) | 114 (2.59%) |
| AST (IU/L) | 63 (1.43%) |
| Total bilirubin (mg/dL) | 86 (1.96%) |
| SBP (mmHg) | 45 (1.02%) |
| DBP (mmHg) | 45 (1.02%) |
| Mean arterial pressure (mmHg) | 45 (1.02%) |
| Temperature (℃) | 8 (0.18%) |
| Weight (kg) | 36 (0.82%) |
| Hemoglobin (g/L) | 3 (0.07%) |
| WBC (K/µL) | 3 (0.07%) |
| Serum potassium (mg/dL) | 3 (0.07%) |
| Serum calcium (mg/dL) | 3 (0.07%) |
| BUN (mg/dL) | 3 (0.07%) |
| RDW (%) | 6 (0.14%) |
| Hematocrit (%) | 4 (0.09%) |
| Serum chloride (mg/dL) | 2 (0.05%) |
| Serum sodium (mg/dL) | 1 (0.02%) |

**Abbreviations:** WBC, white blood cell; PLT, platelet; RDW, red cell distribution width; PT, prothrombin time; PTT, partial thromboplastin time.

**Table S2 Univariate logistic regression analysis**

| **variables** | ***P*** | **OR (95% CI)** |
| --- | --- | --- |
| Gender | **0.009** | 1.230 (1.054 ~ 1.436) |
| Age at admission (years) | **<0.001** | 1.028 (1.023 ~ 1.034) |
| Race | **0.011** | 1.224 (1.048 ~ 1.431) |
| Weight (kg) | **0.001** | 0.994 (0.991 ~ 0.998) |
| Hypertension | 0.283 | 1.089 (0.932 ~ 1.272) |
| Diabetes | **<0.001** | 1.348 (1.136 ~ 1.599) |
| AKI | **<0.001** | 2.693 (2.103 ~ 3.450) |
| Heart rate (bpm) | 0.769 | 1.001 (0.997 ~ 1.004) |
| SBP (mmHg) | **<0.001** | 0.995 (0.992 ~ 0.998) |
| DBP (mmHg) | **<0.001** | 0.993 (0.988 ~ 0.997) |
| Respiratory rate (bpm) | **<0.001** | 1.029 (1.017 ~ 1.041) |
| Temperature (℃) | **0.009** | 0.944 (0.905 ~ 0.986) |
| SpO₂ (%) | 0.511 | 1.001 (0.999 ~ 1.002) |
| Scr(mg/dL) | **<0.001** | 1.133 (1.080 ~ 1.188) |
| LDH (IU/L) | **<0.001** | 1.001 (1.001 ~ 1.001) |
| PLT (K/µL) | **<0.001** | 0.999 (0.998 ~ 0.999) |
| aEASIX | **<0.001** | 1.001 (1.001 ~ 1.001) |
| Ln aEASIX | **<0.001** | 1.481 (1.397 ~ 1.570) |
| WBC (K/µL) | **<0.001** | 1.021 (1.012 ~ 1.031) |
| Hematocrit (%) | 0.092 | 0.990 (0.979 ~ 1.002) |
| Hemoglobin (g/L) | **0.004** | 0.952 (0.921 ~ 0.985) |
| Red blood count (m/uL) | **<0.001** | 0.844 (0.766 ~ 0.931) |
| RDW (%) | **<0.001** | 1.124 (1.092 ~ 1.158) |
| BUN (mg/dL) | **<0.001** | 1.017 (1.013 ~ 1.020) |
| Serum calcium (mg/dL) | 0.126 | 1.061 (0.983 ~ 1.146) |
| Serum chloride (mg/dL) | 0.219 | 0.992 (0.980 ~ 1.005) |
| Serum sodium (mg/dL) | **0.020** | 1.018 (1.003 ~ 1.033) |
| Serum potassium (mg/dL) | **<0.001** | 1.225 (1.112 ~ 1.349) |
| Serum glucose (mg/dL) | **0.008** | 1.001 (1.001 ~ 1.002) |
| PT (sec) | **<0.001** | 1.015 (1.008 ~ 1.022) |
| PTT (sec) | **<0.001** | 1.012 (1.008 ~ 1.015) |
| INR | **<0.001** | 1.187 (1.099 ~ 1.283) |
| Total bilirubin (mg/dL) | **<0.001** | 1.041 (1.026 ~ 1.055) |
| ALT (IU/L) | 0.403 | 1.000 (1.000 ~ 1.000) |
| AST (IU/L) | 0.820 | 1.000 (1.000 ~ 1.000) |
| Albumin (g/dL) | **0.004** | 0.846 (0.754 ~ 0.948) |

**Abbreviations:** Scr, serum creatinine; LDH, lactate dehydrogenase; PLT, platelet count; WBC, white blood cell; RDW, red cell distribution width; BUN, blood urea nitrogen; PT, prothrombin time; PTT, partial thromboplastin time; INR, international normalized ratio; ALT, alanine aminotransferase; AST, aspartate aminotransferase; AKI, acute kidney injury; SBP, systolic blood pressure; DBP, diastolic blood pressure; SpO₂, pulse oxygen saturation; SOFA, Sequential Organ Failure Assessment; ICU, intensive care unit; aEASIX, Age-Adjusted Endothelial Activation and Stress Index.

**Table S3 The variance inflation factor test**

| **variables** 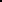 | ***P*** | **OR (95% CI)** | **VIF** |
| --- | --- | --- | --- |
| Gender | 0.058 | 1.185 (0.994 ~ 1.412) | 1.160 |
| Race | 0.058 | 1.175 (0.994 ~ 1.389) | 1.040 |
| Weight (kg) | **<0.001** | 0.989 (0.985 ~ 0.993) | 1.183 |
| Diabetes | 0.151 | 1.153 (0.949 ~ 1.401) | 1.186 |
| AKI | **<0.001** | 2.136 (1.644 ~ 2.776) | 1.114 |
| SBP (mmHg) | 0.562 | 0.998 (0.993 ~ 1.004) | 2.483 |
| DBP (mmHg) | 0.701 | 0.998 (0.985 ~ 1.010) | 1.004 |
| Respiratory rate (bpm) | **<0.001** | 1.022 (1.009 ~ 1.035) | 1.050 |
| Temperature (℃) | 0.075 | 0.960 (0.917 ~ 1.004) | 1.018 |
| Ln aEASIX | **<0.001** | 1.353 (1.256 ~ 1.457) | 1.568 |
| WBC (K/µL) | **<0.001** | 1.021 (1.010 ~ 1.031) | 1.057 |
| Hematocrit (%) | **<0.001** | 1.107 (1.049 ~ 1.169) | 20.846 |
| Hemoglobin (g/L) | 0.103 | 0.879 (0.752 ~ 1.026) | 19.356 |
| Red blood count (m/uL) | **0.018** | 0.710 (0.535 ~ 0.944) | 7.632 |
| RDW (%) | **<0.001** | 1.072 (1.031 ~ 1.115) | 1.592 |
| BUN (mg/dL) | **0.002** | 1.006 (1.002 ~ 1.011) | 1.471 |
| Serum sodium (mg/dL) | 0.101 | 1.013 (0.997 ~ 1.029) | 1.086 |
| Serum potassium (mg/dL) | 0.623 | 0.972 (0.869 ~ 1.088) | 1.224 |
| Serum glucose (mg/dL) | 0.154 | 1.001 (1.000 ~ 1.002) | 1.157 |
| PT (sec) | 0.913 | 0.999 (0.981 ~ 1.017) | 6.887 |
| PTT (sec) | **<0.001** | 1.007 (1.003 ~ 1.011) | 1.160 |
| INR | 0.690 | 0.959 (0.781 ~ 1.178) | 6.888 |
| Total bilirubin (mg/dL) | 0.444 | 1.007 (0.989 ~ 1.025) | 1.435 |
| Albumin (g/dL) | 0.121 | 1.110 (0.973 ~ 1.266 | 1.268 |

**Notes:**

(1) Univariate binary logistic regression was used to select variables with P < 0.1 for inclusion in the subsequent adjusted models; (2) Due to the calculation formulas for the Age-Adjusted Endothelial Activation and Stress Index (aEASIX = age * (Scr * LDH / PLT)), age, Scr, LDH, and PLT were excluded as variables. Considering that the SOFA score includes too many variables, which can cause a biased dataset, it was not included for further analysis.(3) Variables with a variance inflation factor greater than 5, such as hematocrit, red blood count, were also removed; (4) The final model retained the following variables: Weight, WBC, RDW, PTT, BUN, Respiratory rate, and AKI (yes/no).

**Abbreviations:** Scr, serum creatinine; LDH, lactate dehydrogenase; PLT, platelet count; AKI, acute kidney injury; SBP, systolic blood pressure; DBP, diastolic blood pressure; aEASIX, Age-Adjusted Endothelial Activation and Stress Index; WBC, white blood cell; RDW, red cell distribution width; BUN, blood urea nitrogen. PT, prothrombin time; PTT, partial thromboplastin time; INR, international normalized ratio.
